# Supplementary material for: Fungi, bacteria and oomycota opportunistically isolated from the seagrass, Zostera marina
Source: PLoS One. 2020 Jul 22;15(7):e0236135. doi: 10.1371/journal.pone.0236135 (PMC7375540; doi:10.1371/journal.pone.0236135)
Supplement: S2 Table — Here we report the GenBank accession number and taxonomic information (Class, Order, Molecular ID) for each fungal 28S rRNA gene sequence obtained based on top BLAST matches to fungal isolates in Table 1 and used here to generate Figs 3–6 and S7–10. (XLSX) [file pone.0236135.s013.xlsx]

## Sheet: Sheet1
S2 Table: Fungal sequences used in molecular phylogeny found based on top BLAST matches to Zostera marina associated fungal isolates
Class	Order	Species	Genbank Accession (LSU)
Dothideomycetes	Capnodiales	Cladosporium langeronii	DQ780380.2
Dothideomycetes	Capnodiales	Ramularia miae	DQ885902.1
Dothideomycetes	Capnodiales	Ramularia pratensis	EU019284.2
Dothideomycetes	Capnodiales	Cladosporium herbarum	MH047193.1
Dothideomycetes	Capnodiales	Cladosporium cladosporioides	KX664413.1
Dothideomycetes	Capnodiales	Cladosporium herbarum	KX664311.1
Dothideomycetes	Capnodiales	Cladosporium sp.	MH047202.1
Dothideomycetes	Capnodiales	Cladosporium antarcticum	MH481703.1
Dothideomycetes	Dothideales	Aureobasidium pullulans	LN906592.1
Dothideomycetes	Pleosporales	Epicoccum nigrum	KX664326.1
Dothideomycetes	Pleosporales	Epicoccum nigrum	KX664419.1
Eurotiomycetes	Eurotiales	Penicillium restrictum	AF033457.1
Eurotiomycetes	Eurotiales	Penicillium atrovenetum	AF033492.1
Eurotiomycetes	Eurotiales	Penicillium roseopurpureum	AF034462.1
Eurotiomycetes	Eurotiales	Penicillium canariense	AF481121.1
Eurotiomycetes	Eurotiales	Penicillium biourgeianum	AY484909.1
Eurotiomycetes	Eurotiales	Penicillium coprobium	DQ339559.1
Eurotiomycetes	Eurotiales	Penicillium restrictum	KF367458.1
Eurotiomycetes	Eurotiales	Talaromyces sp.	KP851980.1
Eurotiomycetes	Eurotiales	Penicillium sp.	LT899782.1
Eurotiomycetes	Eurotiales	Talaromyces sp.	LT899794.1
Sordariomycetes	Glomerellales	Colletotrichum gloeosporioides	AJ301972.1
Sordariomycetes	Glomerellales	Acrostalagmus luteoalbus	KC311495.1
Sordariomycetes	Hypocreales	Unclassified fungal endophyte	EU687056.1
Sordariomycetes	Hypocreales	Fungal sp.	KP757549.1
Sordariomycetes	Hypocreales	Sarocladium bacillisporum	KY781808.1
Sordariomycetes	Hypocreales	Emericellopsis maritima	MH871998.1
Sordariomycetes	Hypocreales	Trichoderma harzianum	MK673510.1
Microbotryomycetes	Sporidiobolales	Rhodotorula mucilaginosa	KY218712.1
Tremellomycetes	Filobasidiales	Naganishia globosa	JX188127.1
Ustilaginomycetes	Ustilaginales	Pseudozyma sp.	JX188216.1
Zygomycetes	Mucorales	Absidia cylindrospora	MK674163.1
Zygomycetes	Mucorales	Absidia cylindrospora var. cylindrospora	JN206588
Zygomycetes	Mucorales	Absidia cylindrospora var. nigra	NG_058560
Sordariomycetes	Glomerellales	Colletotrichum godetiae	LT717064
Sordariomycetes	Glomerellales	Colletotrichum acutatum	AJ301971
Sordariomycetes	Glomerellales	Acrostalagmus annulatus	LR025806
